# Supplementary material for: Design optimization of a contact-aided continuum robot for endobronchial interventions based on anatomical constraints
Source: Springer Nature journal article supplement (doi:10.1007/s11548-019-01972-8), 2019-04-15
Supplement: MOESM1 [file 16658452]

## Design Optimization of A Contact-Aided Continuum Robot for Endobronchial Interventions Based on Anatomical Constraints - Supplementary material

### Supplementary Model Validation Figures

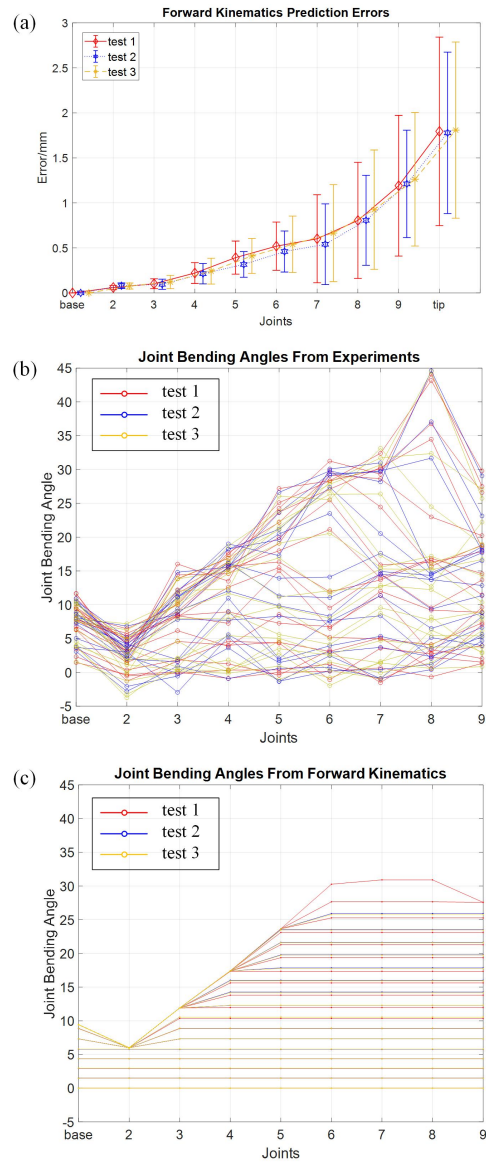

**Fig. 1** Supplementary model validation figures. (a) Joint and tip position average errors during deflection for three different deflection trials with the standard deviation indicated. (b) Experimental joint bending angles during the bending tests. The different colours indicate the different tests. (c) Simulated joint bending angles during the bending tests.

## Supplementary Use Case I Simulation Figures

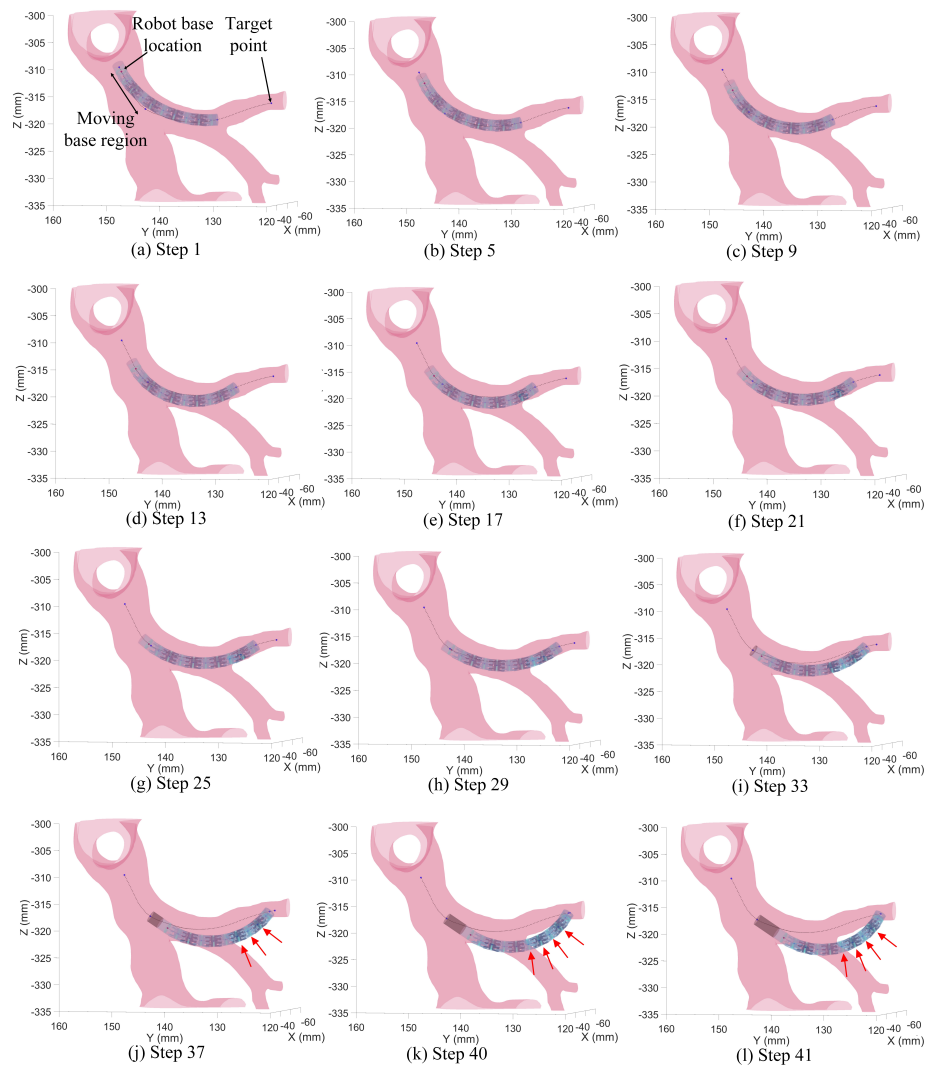

**Fig. 2** Simulation results for the constant-curvature CR with optimized joint angle limits with moving base up to 10mm.

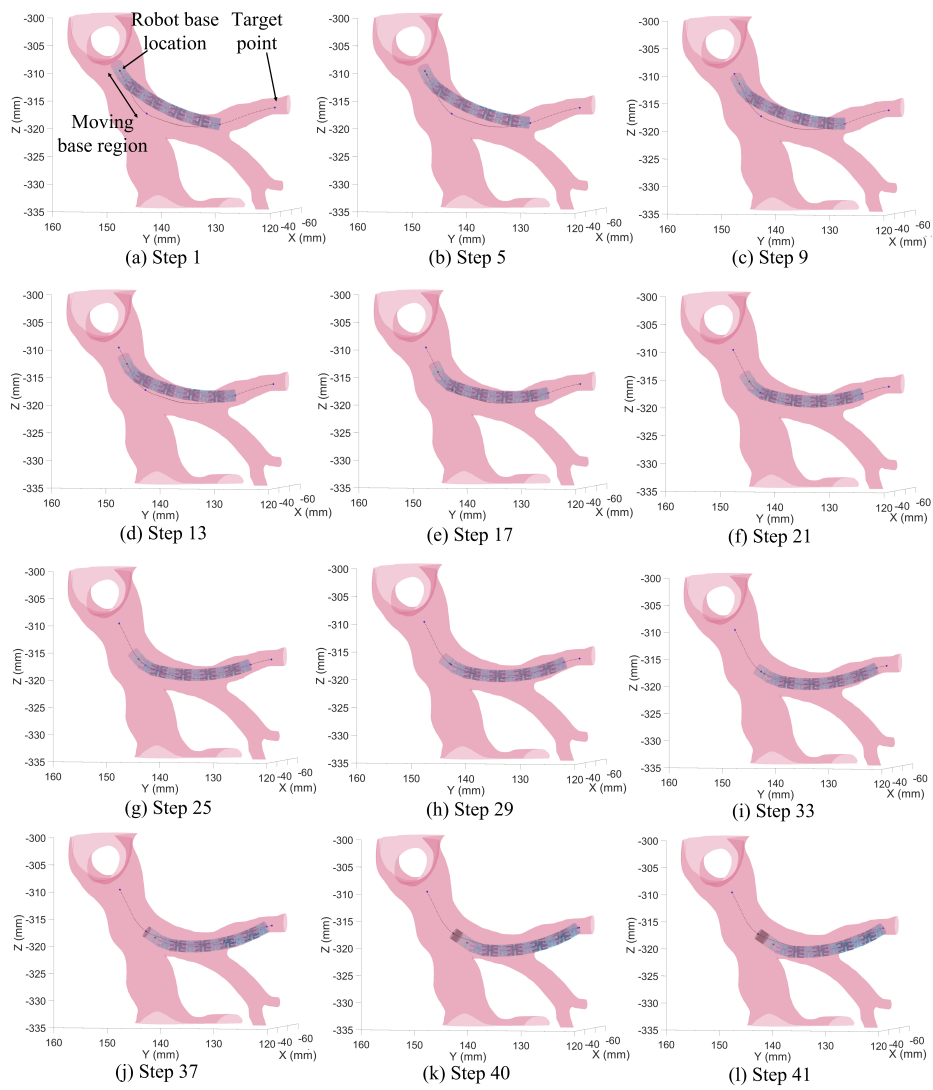

**Fig. 3** Simulation results for the CR with optimized joint angle limits with moving base up to 10mm.

## Use Case II

We have also optimized the joint angle limits of the continuum robot to reach a target located in a distal area of bronchus II, which cannot be reached by the bronchoscope due to the reduced diameter of the bronchus, and compared the performance of the optimized design with the state-of-the-art design that has constant curvature. Several base locations of the robot are tested; it is first assumed to be fixed and then translated up to 2.5 mm, 5 mm and 7.5 mm along the centerline as the bronchoscope is pushed further into the bronchus. The bronchoscope is not pushed more than 7.5 mm as the radius of the bronchus becomes too small for the bronchoscope to fit in. Optimized designs are obtained for each of the three cases mentioned. First, a table summarizing the joint bending limits and the objective function for each case is shown (Table 1). After that, sequences of images illustrating the motion plan of the constant-curvature robot and the optimized continuum robot for the cases with the lowest objective function are shown.

For the case in which the base of the robot is fixed, the optimized design, which allows non-constant curvature, can reach further than the constant-curvature design. However, the target cannot be reached and collision with the anatomy takes place, specially at the last steps. When considering that the base can be moved up to 2.5 mm, 5 mm and 7.5 mm, the result with minimum objective function value is obtained for the optimized design in which the robot base moves up to 7.5 mm (see Table 1). At this point, the orientation of the tip of the bronchoscope is changed considerably, which makes the robot translation direction be more suitable to reach the target (see Figs. 4 and 5). This allows the robot to reach the target for both the constant-curvature robot and the optimized one. However, for the constant curvature one, the collision is much higher than for the optimized design, which offers non-constant curvature deflection. Thus, we can conclude that for this case, the best result is obtained for a non-constant curvature robot with joint angles limits being  $10^\circ$  for the first two joints and  $5^\circ$  for the rest, when the orientation of the tip of the bronchoscope is adjusted by moving it up to 7.5 mm from the initial base position following the centerline.

|                         |                      | Constant-curvature CR         | Optimized CR                                                 |
|-------------------------|----------------------|-------------------------------|--------------------------------------------------------------|
| Fixed base              | Joint bending limits | $20^\circ$ for all the joints | $25^\circ$ for the first two joints. $5^\circ$ for the rest. |
|                         | Objective function   | 35.15                         | 25.20                                                        |
| Moving base up to 2.5mm | Joint bending limits | $20^\circ$ for all the joints | $20^\circ$ for the first two joints. $5^\circ$ for the rest. |
|                         | Objective function   | 14.125                        | 8.815                                                        |
| Moving base up to 5mm   | Joint bending limits | $20^\circ$ for all the joints | $15^\circ$ for the first two joints. $5^\circ$ for the rest. |
|                         | Objective function   | 13.85                         | 9.16                                                         |
| Moving base up to 7.5mm | Joint bending limits | $20^\circ$ for all the joints | $10^\circ$ for the first two joints. $5^\circ$ for the rest. |
|                         | Objective function   | 7.36                          | 5.50                                                         |

**Table 1** Summary of the design optimization results for bronchus II. The objective function values have been scaled by dividing them by the maximum possible value and multiplied them by 100 for clarity.



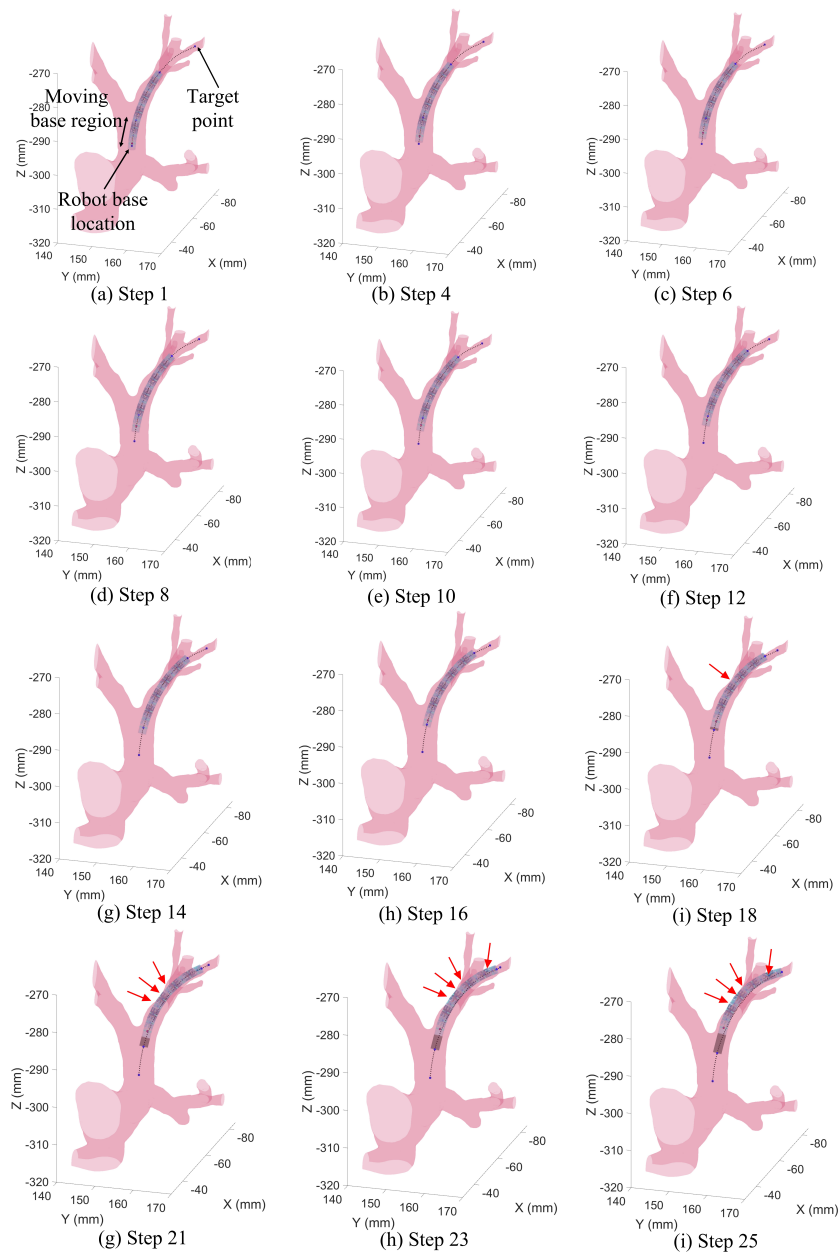

**Fig. 4** Simulation results for the continuum robot with constant curvature with moving base up to 7.5 mm at bronchus II. Arrows indicate the points that are considered to be colliding with the anatomy.

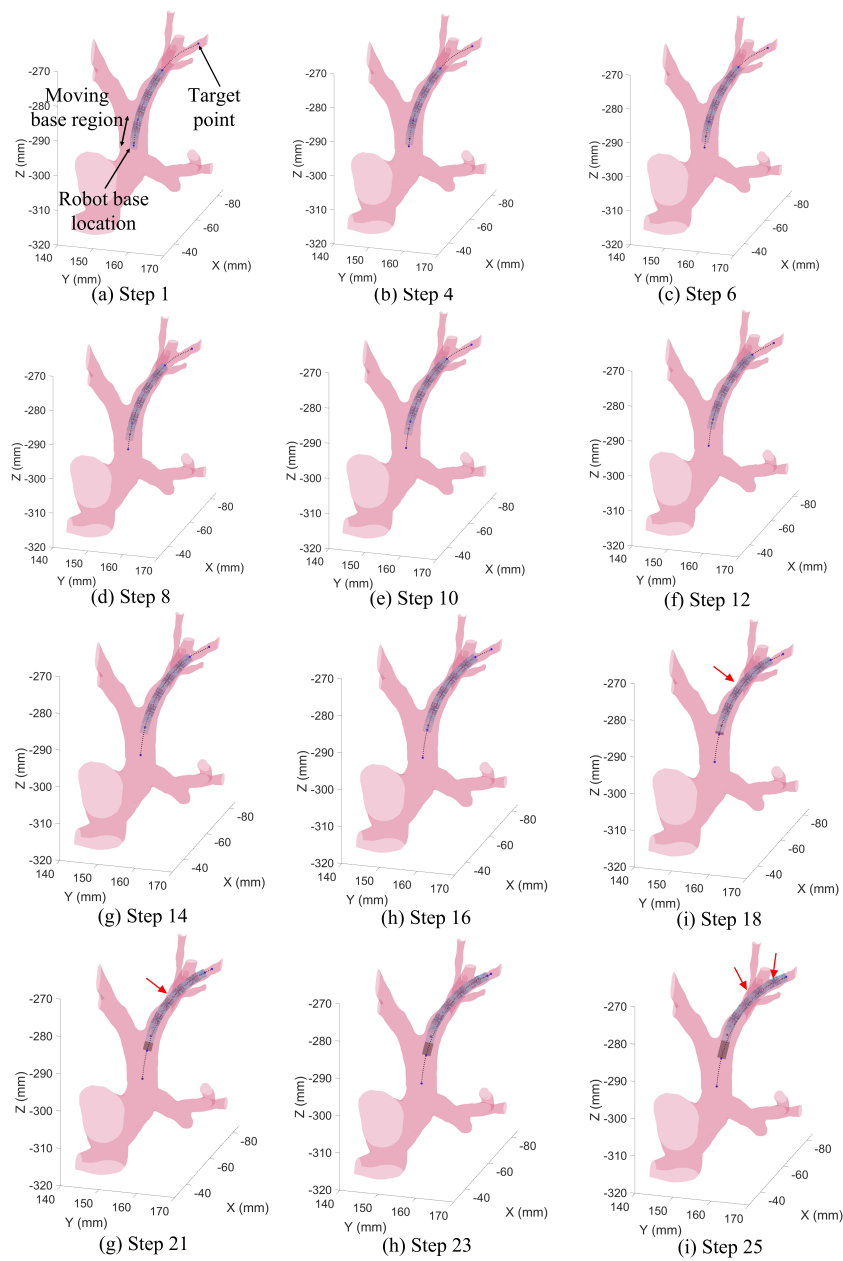

**Fig. 5** Simulation results for the continuum robot with optimized joint angle limits with moving base up to 7.5 mm at bronchus II. Arrows indicate the points that are considered to be colliding with the anatomy.
